# Supplementary material for: Perfect cubic metallo-borospherenes TM8B6 (TM = Ni, Pd, Pt) as superatoms following the 18-electron rule
Source: Royal Society of Chemistry journal article supplement (doi:10.1039/d3na00551h), 2023-01-01
Supplement: d3na00551h1.pdf [file d3na00551h1.pdf]

# Perfect Cubic Aromatic Metallo-Borospherenes $\text{TM}_8\text{B}_6$ (TM = Ni, Pd, Pt) As Superatoms Matching the 18-Electron Rule

Mei-Zhen Ao,<sup>a,b</sup> Yuan-Yuan Ma,<sup>c</sup> Yue-Wen Mu,<sup>\*a</sup> and Si-Dian Li<sup>\*a</sup>

<sup>a</sup>Institute of Molecular Science, Shanxi University, Taiyuan 030006, China.

<sup>b</sup>Fenyang College of Shanxi Medical University, Fenyang 032200, China

<sup>c</sup>Shanxi Institute of Energy, Taiyuan 030006, China

\*E-mail: ywmu@sxu.edu.cn and lisidian@sxu.edu.cn

## Table of Contents

**Figure S1.** Low-lying isomers of  $\text{Ni}_8\text{B}_6$ .

**Figure S2.** Low-lying isomers of  $\text{Pd}_8\text{B}_6$ .

**Figure S3.** Low-lying isomers of  $\text{Pt}_8\text{B}_6$ .

**Figure S4.** Low-lying isomers of  $\text{Ni}_8\text{B}_6^{-1}$ .

**Figure S5.** BOMD simulations of (a)  $O_h \text{Ni}_6\text{B}_6$  (**1**), (b)  $O_h \text{Pd}_6\text{B}_6$  (**2**), and (c)  $O_h \text{Pt}_6\text{B}_6$  (**3**) at different temperatures.

**Figure S6** The  $1\text{S}^21\text{P}^61\text{D}^{10}$  18-electron configurations of  $O_h \text{Pd}_8\text{B}_6$  (**2**) and  $O_h \text{Pt}_8\text{B}_6$  (**3**) and (b) AdNDP bonding patterns of  $O_h \text{Pd}_8\text{B}_6$  (**2**) and  $O_h \text{Pt}_8\text{B}_6$  (**3**).

**Figure S7.** Simulated IR, Raman and UV-vis spectra of (a)  $O_h \text{Pd}_8\text{B}_6$  and (b)  $O_h \text{Pt}_8\text{B}_6$ .

**Table S1.** Optimized cartesian coordinates (x, y, z) of (a)  $O_h \text{Ni}_6\text{B}_6$  (**1**), (b)  $O_h \text{Pd}_6\text{B}_6$  (**2**), (c)  $O_h \text{Pt}_6\text{B}_6$  (**3**), and (d)  $O_h \text{Ni}_8\text{B}_6^{-1}$  (**1'**) at PBE0/6-311+G(d) level.

**Figure S1.** Low-lying isomers of Ni<sub>8</sub>B<sub>6</sub> with its relative energies indicated in eV at PBE0 and TPSSh (parentheses) levels, respectively.

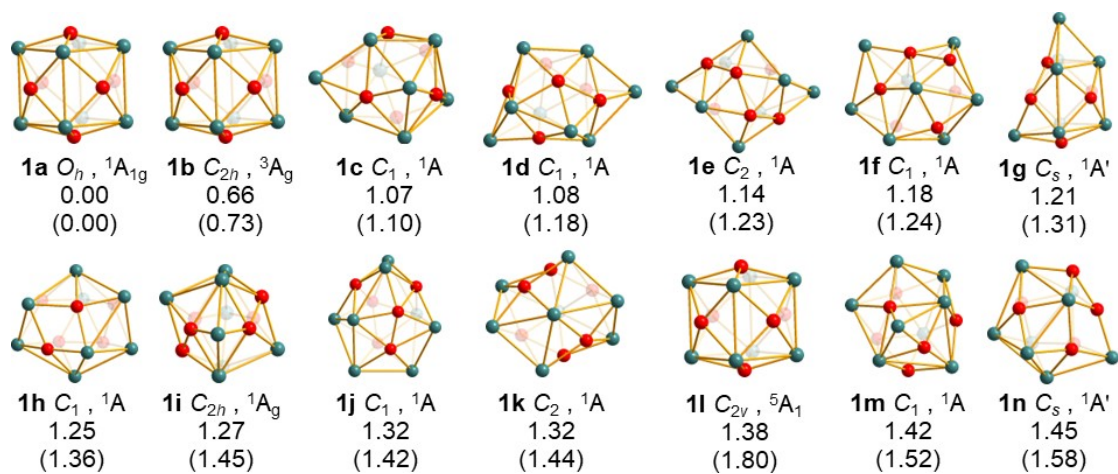

**Figure S2.** Low-lying isomers of Pd<sub>8</sub>B<sub>6</sub> with its relative energies indicated in eV at PBE0 and TPSSh (parentheses) levels, respectively.

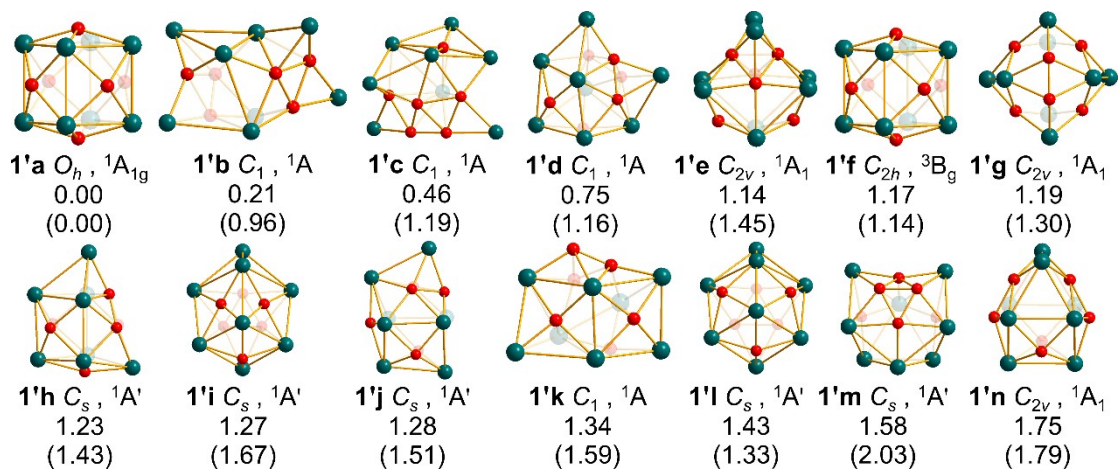

**Figure S3.** Low-lying isomers of  $\text{Pt}_8\text{B}_6$  with its relative energies indicated in eV at PBE0 and TPSSh (parentheses) levels, respectively.

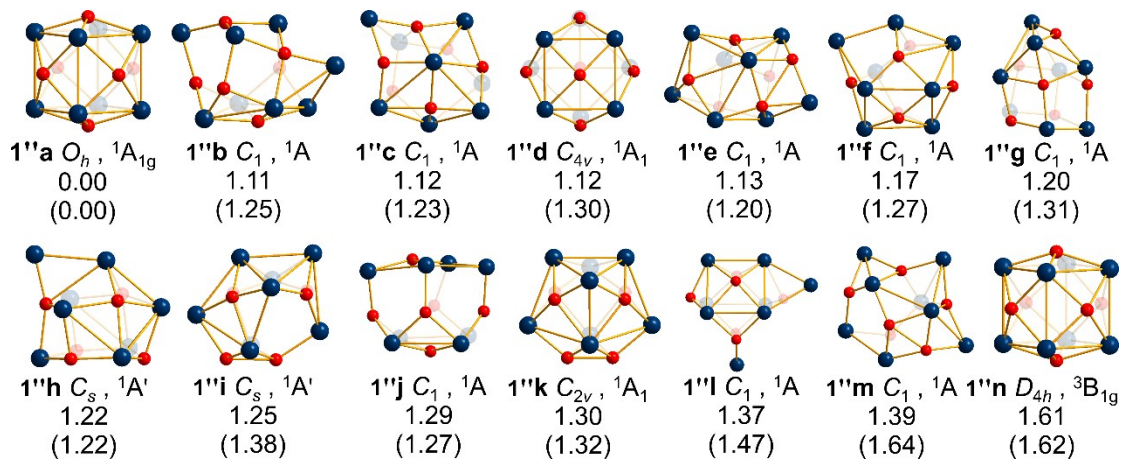

**Figure S4.** Low-lying isomers of monoanion  $\text{Ni}_8\text{B}_6^{-1}$  with its relative energies indicated in eV at PBE0 and TPSSh (parentheses) levels, respectively.

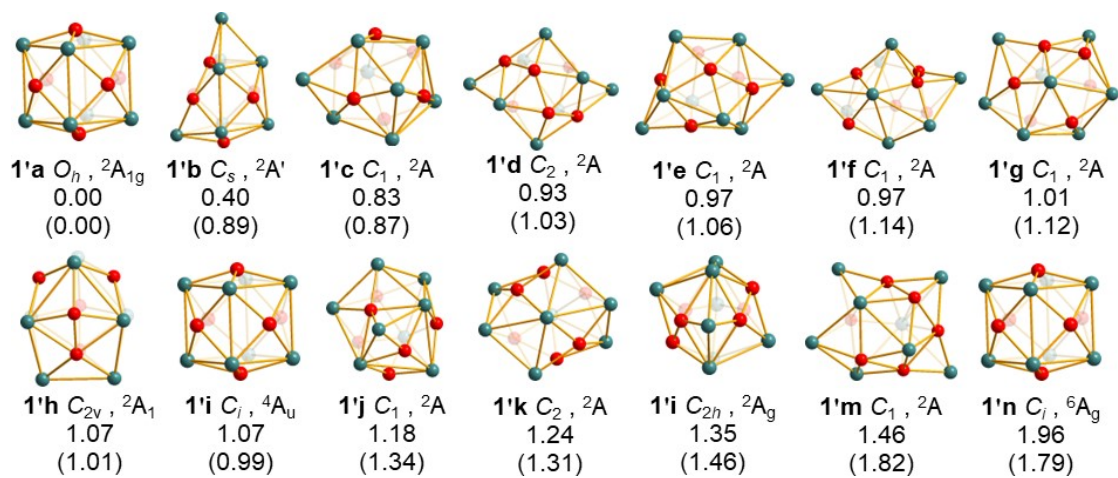

**Figure S5.** BOMD simulations of (a)  $O_h$   $Ni_8B_6$  (1), (b)  $O_h$   $Pd_8B_6$  (2), and (c)  $O_h$   $Pt_8B_6$  (3) at different temperatures with the RMSD and MAXD indicated in Å.

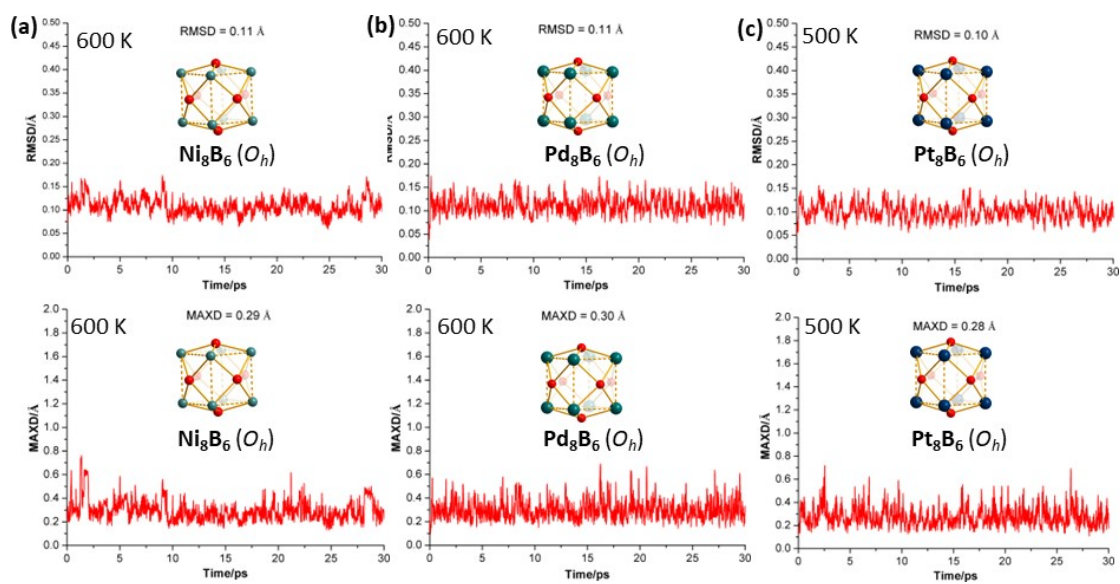

**Figure S6** (a) The  $1S^21P^61D^{10}$  18-electron configurations of  $O_h$   $Pd_8B_6$  (**2**) and  $O_h$   $Pt_8B_6$  (**3**). The black and red solid lines refer to occupied and unoccupied orbitals, respectively. (b) AdNDP bonding patterns of  $O_h$   $Pd_8B_6$  (**2**) and  $O_h$   $Pt_8B_6$  (**3**) with the occupation numbers (ONs) indicated.

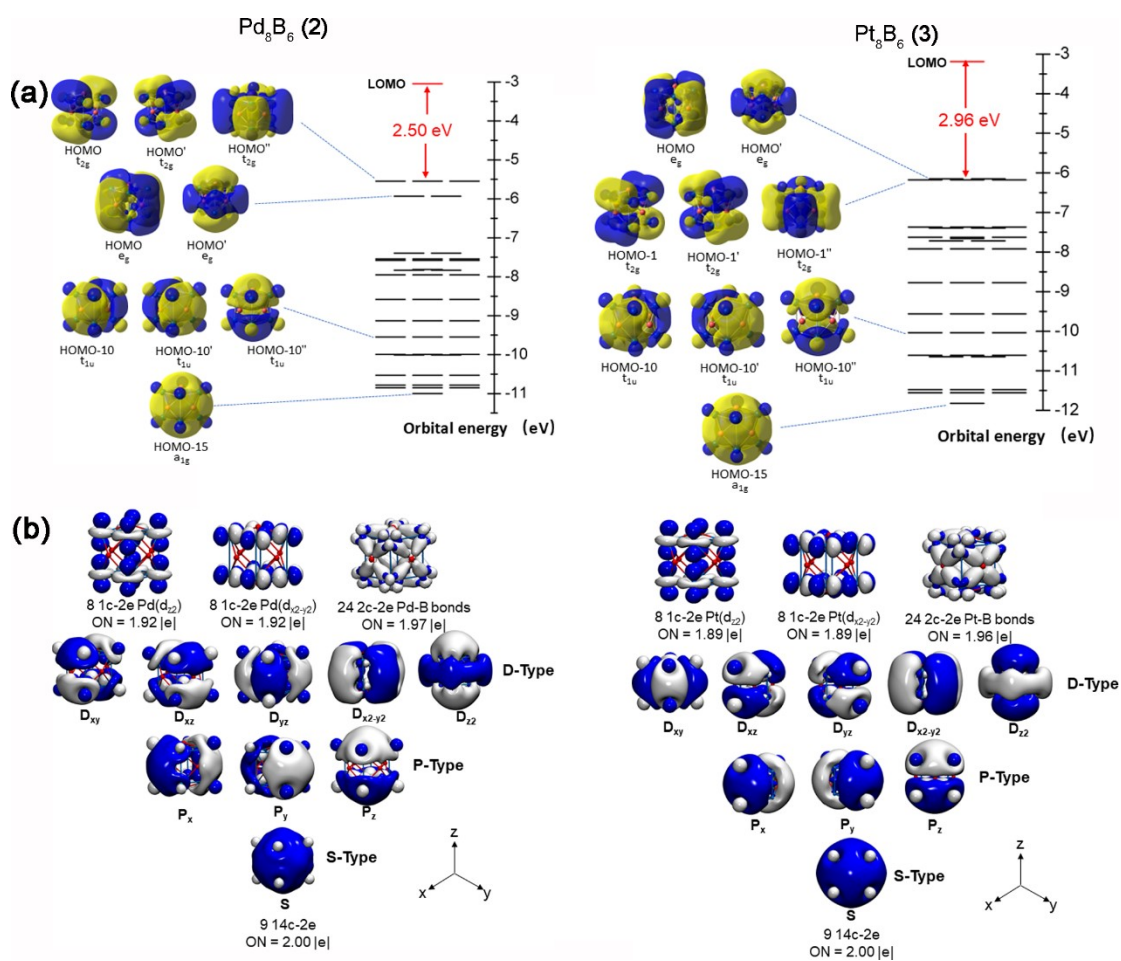

**Figure S7.** Simulated IR, Raman and UV-vis spectra of (a)  $O_h$  Pd<sub>8</sub>B<sub>6</sub> and (b)  $O_h$  Pt<sub>8</sub>B<sub>6</sub> at PBE0/6-311+G(d) level.

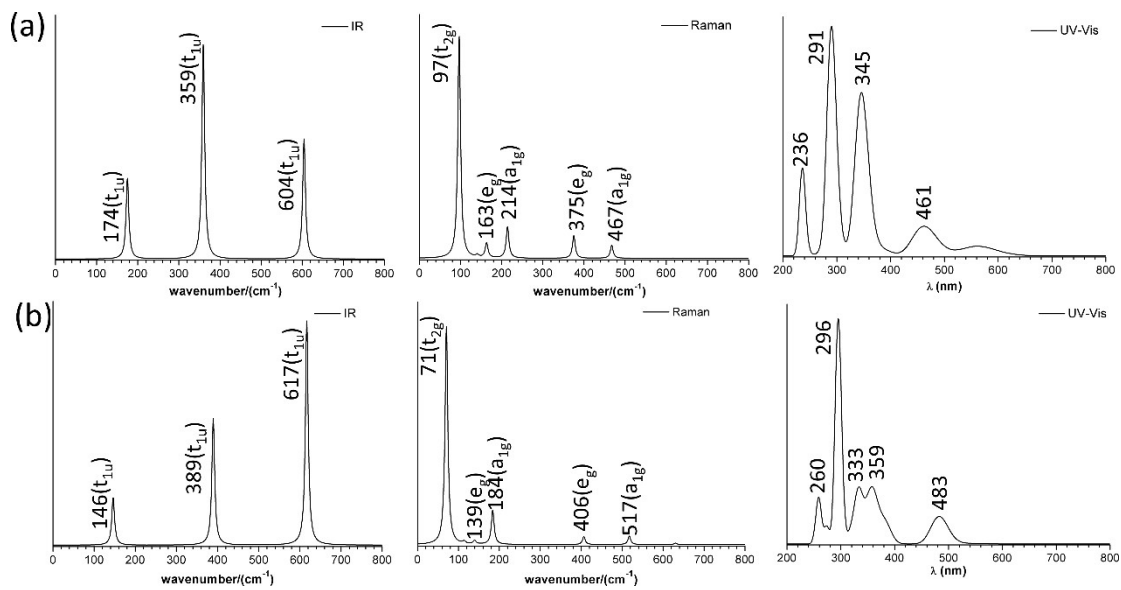



**Table S1.** Optimized cartesian coordinates (x, y, z) of (a)  $O_h$  Ni<sub>6</sub>B<sub>6</sub> (**1**), (b)  $O_h$  Pd<sub>6</sub>B<sub>6</sub> (**1'**), (c)  $O_h$  Pt<sub>6</sub>B<sub>6</sub> (**1''**), and (d)  $O_h$  Ni<sub>8</sub>B<sub>6</sub><sup>-1</sup> (**2**) at PBE0/6-311+G(d) level.

(a)  $O_h$  Ni<sub>6</sub> B<sub>6</sub> (**1**)

|    |             |             |             |
|----|-------------|-------------|-------------|
| B  | 0.00000000  | 0.00000000  | 1.79487300  |
| B  | 0.00000000  | 1.79487300  | 0.00000000  |
| B  | 0.00000000  | 0.00000000  | -1.79487300 |
| B  | 0.00000000  | -1.79487300 | 0.00000000  |
| B  | 1.79487300  | 0.00000000  | 0.00000000  |
| B  | -1.79487300 | 0.00000000  | 0.00000000  |
| Ni | -1.30575600 | 1.30575600  | 1.30575600  |
| Ni | 1.30575600  | 1.30575600  | 1.30575600  |
| Ni | 1.30575600  | 1.30575600  | -1.30575600 |
| Ni | -1.30575600 | 1.30575600  | -1.30575600 |
| Ni | -1.30575600 | -1.30575600 | -1.30575600 |
| Ni | -1.30575600 | -1.30575600 | 1.30575600  |
| Ni | 1.30575600  | -1.30575600 | -1.30575600 |
| Ni | 1.30575600  | -1.30575600 | 1.30575600  |

(b)  $O_h$  Pd<sub>6</sub>B<sub>6</sub> (**2**)

|    |             |             |             |
|----|-------------|-------------|-------------|
| B  | 0.00000000  | 0.00000000  | 1.97396900  |
| B  | 0.00000000  | 1.97396900  | 0.00000000  |
| B  | 0.00000000  | 0.00000000  | -1.97396900 |
| B  | 0.00000000  | -1.97396900 | 0.00000000  |
| B  | 1.97396900  | 0.00000000  | 0.00000000  |
| B  | -1.97396900 | 0.00000000  | 0.00000000  |
| Pd | -1.40539300 | 1.40539300  | 1.40539300  |
| Pd | 1.40539300  | 1.40539300  | 1.40539300  |
| Pd | -1.40539300 | -1.40539300 | 1.40539300  |
| Pd | 1.40539300  | -1.40539300 | -1.40539300 |
| Pd | -1.40539300 | -1.40539300 | -1.40539300 |
| Pd | -1.40539300 | 1.40539300  | -1.40539300 |
| Pd | 1.40539300  | 1.40539300  | -1.40539300 |
| Pd | 1.40539300  | -1.40539300 | 1.40539300  |

(c)  $O_h$  Pt<sub>6</sub>B<sub>6</sub> (**3**)

|    |             |             |             |
|----|-------------|-------------|-------------|
| Pt | 1.40832700  | -1.40832700 | -1.40832700 |
| Pt | 1.40832700  | -1.40832700 | 1.40832700  |
| Pt | 1.40832700  | 1.40832700  | 1.40832700  |
| Pt | 1.40832700  | 1.40832700  | -1.40832700 |
| Pt | -1.40832700 | -1.40832700 | -1.40832700 |
| Pt | -1.40832700 | -1.40832700 | 1.40832700  |
| Pt | -1.40832700 | 1.40832700  | 1.40832700  |
| Pt | -1.40832700 | 1.40832700  | -1.40832700 |
| B  | 0.00000000  | 0.00000000  | 2.00454300  |
| B  | 0.00000000  | 2.00454300  | 0.00000000  |
| B  | 0.00000000  | 0.00000000  | -2.00454300 |
| B  | 0.00000000  | -2.00454300 | 0.00000000  |
| B  | 2.00454300  | 0.00000000  | 0.00000000  |
| B  | -2.00454300 | 0.00000000  | 0.00000000  |

(d)  $O_h$  Ni<sub>8</sub>B<sub>6</sub><sup>-1</sup> (**1'**)

|   |            |            |            |
|---|------------|------------|------------|
| B | 0.00000000 | 0.00000000 | 1.79487300 |
| B | 0.00000000 | 1.79487300 | 0.00000000 |

|    |             |             |             |
|----|-------------|-------------|-------------|
| B  | 0.00000000  | 0.00000000  | -1.79487300 |
| B  | 0.00000000  | -1.79487300 | 0.00000000  |
| B  | 1.79487300  | 0.00000000  | 0.00000000  |
| B  | -1.79487300 | 0.00000000  | 0.00000000  |
| Ni | -1.30575600 | 1.30575600  | 1.30575600  |
| Ni | 1.30575600  | 1.30575600  | 1.30575600  |
| Ni | 1.30575600  | 1.30575600  | -1.30575600 |
| Ni | -1.30575600 | 1.30575600  | -1.30575600 |
| Ni | -1.30575600 | -1.30575600 | -1.30575600 |
| Ni | -1.30575600 | -1.30575600 | 1.30575600  |
| Ni | 1.30575600  | -1.30575600 | -1.30575600 |
| Ni | 1.30575600  | -1.30575600 | 1.30575600  |
